# Supplementary material
Source: publisher figshare collection journal article supplement (https://acs.figshare.com/ndownloader/files/5357835)
Supplement: Supplementary file 1 [file 5357835]

# Experimental Determination and Correlation of Liquid-Liquid Equilibria for Methyl Isopropyl Ketone + Phenol + Water Mixtures at 298.15, 313.15 and 323.15 K

Ran Lv, Libo Li, Huimin Wang, and Yun Chen\*

Key Laboratory of Heat Transfer Enhancement and Energy Conservation of Ministry of Education, School of Chemistry and Chemical Engineering, South China University of Technology, Guangzhou, 510640, P.R.China

## Supporting Information

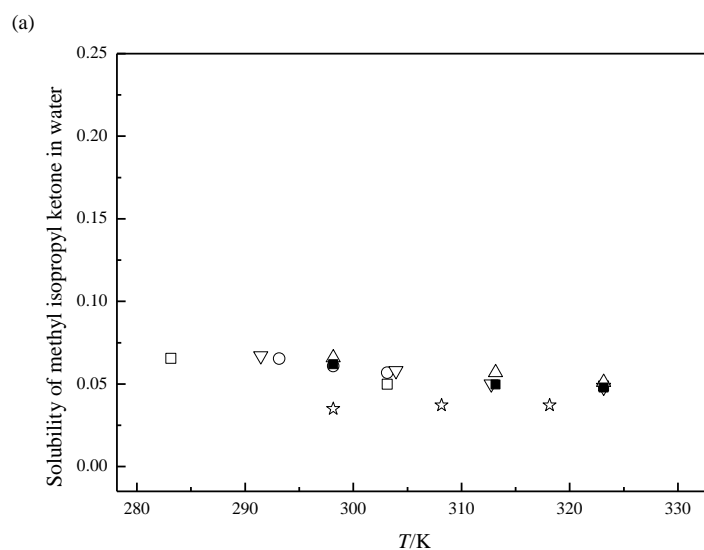

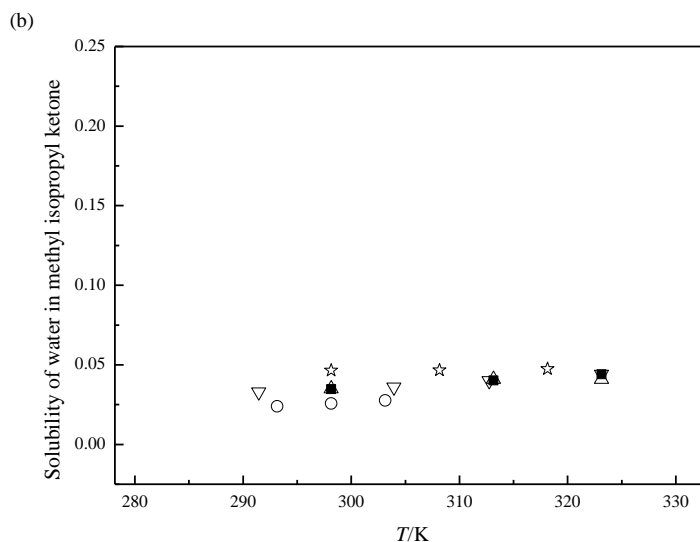

**Figure S1.** Comparisons of experimental solubility of methyl isopropyl ketone in water (a) and experimental solubility of water in methyl isopropyl ketone (b) with that reported in literature: ■, experimental data; □, literature data from Gross et al.;<sup>28</sup> ○, literature data from Ginnings et al.;<sup>29</sup> Δ, literature data from Bozdag and Lamb;<sup>30</sup> ▽, literature data from Stephenson;<sup>31</sup> ☆, literature data from Taghikhani et al..<sup>32</sup>

## References

- (28) Gross, P. M.; Rintelen, J. C.; Saylor, J. H. Energy and Volume Relations in the Solubilities of Some Ketones in Water. *J. Phys. Chem.* **1939**, *43*, 197-205.
- (29) Ginnings, P. M.; Plonk, D.; Cater, E. Aqueous Solubilities of Some Aliphatic Ketones. *J. Am. Chem. Soc.* **1940**, *62*, 1923-1924.
- (30) Bozdag, O.; Lamb, J. A. Liquid-Liquid Phase Equilibria in the 3-Methyl-2-Butanone + Water System at High Pressure. *Fluid Phase Equilib.* **1981**, *6*, 191-201.
- (31) Stephenson, R. M. Mutual Solubilities: Water-Ketones, Water-Ethers, and Water-Gasoline-Alcohols. *J. Chem. Eng. Data* **1992**, *37*, 80-95.
- (32) Taghikhani, V.; Vakili-Nezhaad, G. R.; Khoshkbarchi, M. K.; Shariaty-Niassar, M. Liquid-Liquid Equilibria of Water + Propionic Acid + Methyl Butyl Ketone and of Water + Propionic Acid + Methyl Isopropyl Ketone. *J. Chem. Eng. Data* **2001**, *46*, 1107-1109.
